# Supplementary material
Source: publisher site journal article supplement (http://www.spandidos-publications.com/987/downloadSupplementary)

Figure S1. Results of western blot analysis and the histogram of relative protein levels of DEK in HBE cells and six NSCLC cell lines (A549, H1299, SK-MES-1, LK2, H460 and H661). GAPDH served as an internal control. HBE, human bronchial epithelial; NSCLC, non-small cell lung cancer.

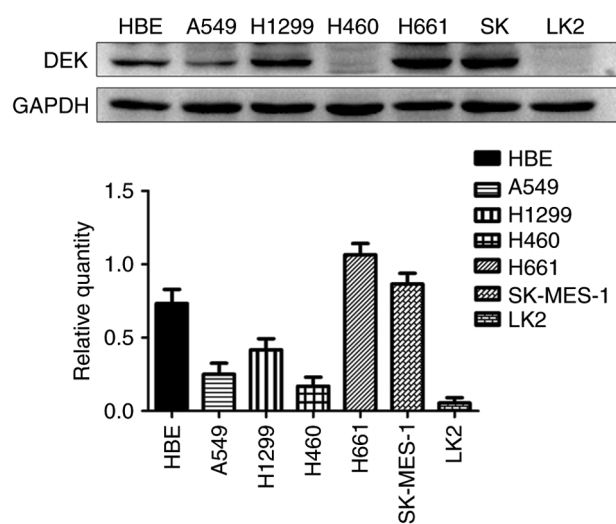

Supplement: Supplementary file 1 [file downloadSupplementary]
